# Supplementary material
Source: publisher site journal article supplement (https://www.degruyter.com/publication/isbn/9783598440311/downloadAsset/9783598440311_Brochure--en.pdf)
Supplement: Supplementary file 1 [file 9783598440311_Brochure--en.pdf]

## Bibliothekswissenschaft - quo vadis? Library Science - quo vadis?

Eine Disziplin zwischen Traditionen und Visionen:

Programme – Modelle – Forschungsaufgaben /

**A Discipline between Challenges and Opportunities:**

**Programs – Models – Research Assignments**

Edited by Petra Hauke. With a preface by Guy St. Clair,  
Consulting Specialist for Knowledge Management and Learning,  
New York, NY and a foreword by Georg Ruppelt, Speaker of  
BID - Bibliothek & Information Deutschland Bundesvereinigung  
Deutscher Bibliotheks und Informationsverbände e.V.

2005. 480 pages. Hardbound

€ 75.00

ISBN 3-598-11734-5

This work addresses changes in information structures  
and requirements faced by libraries and library science;  
changes that demand they redefine their positions, face  
new challenges and present definite perspectives in the  
form of research goals and pilot schemes.

This work contains 31 contributions by distinguished  
authors, shedding light on the following subjects: Library  
science between tradition, self-conception and public  
perception; Library science in the age of digital media;  
Library science in the service of society; Library science  
in the service of scientific information and communica-  
tion; Library science in the service of practical librarian-  
ship; Library science in teaching, studying and profession.  
The issues dealt with include electronic publishing,  
eLearning and information ethics, the 'Open Access'  
debate, conveying information competence to (not only)  
universities, reciprocation between the economy, politics  
and libraries, and also, library science training in view  
of librarianship in practice.

Contributions are written in either German or English,  
and the appendix contains abstracts in English.

Megill, Kenneth A.

## Corporate Memory

Records and Information Management in the  
Knowledge Age

2nd edition 2005. XII, 143 pages. Hardbound

€ 68.00

ISBN 3-598-24371-5

 eBook. 2nd edition 2005

Price on request

ISBN 3-598-44011-1

*Corporate memory* is the body of information that an  
organization needs to keep for re-use. It is the active and  
historical information that an organization has that is  
worth sharing, managing and preserving to enable it to  
function effectively. This book is aimed at records man-  
agers and archivists, who are responsible for maintain-  
ing and managing information within an organization. It  
describes fully the most up-to-date methods and  
approaches to this essential function. In addition, it also  
discusses the adoption of an international standard for  
record management.

*For prices and more information about eBooks from K.  
G. Saur Verlag please contact your regional office.*

Hill, Michael W.

## The Impact of Information on Society

An examination of its nature, value and usage

2nd revised and updated edition

2005. XII, 340 pages. Hardbound

€ 98.00

ISBN 3-598-11648-9

This new edition of *Impact of Information on Society*  
takes account of a number of new developments affect-  
ing information's impact on our lives. It also incorporates  
lessons to be learnt from prominent events. For example,  
a 'UK Freedom of Information Act', forecast in the 1st  
edition, is now law and so updating is necessary. The  
growing significance of knowledge management today  
requires a closer look at this field and clarification of its  
relation to information management. The first edition has  
been reviewed critically and sections have been ampli-  
fied and rearranged, with new material being added  
where necessary. To mention just a few points: since the  
1st edition, there have been amendments to copyright,  
data protection legislation and human rights legislation.  
The consequences of the enormous and growing level of  
use of the Internet, eMail and mobile phones (including  
text messaging) also requires reassessment.

## Wissenschaft und Kultur in Bibliotheken, Museen und Archiven

Festschrift für Klaus-Dieter Lehmann zum 65. Geburtstag

(Scholarship and Culture in Libraries, Museums and  
Archives. Festschrift for Klaus-Dieter Lehmann, in honour  
of his 65th Birthday)

Edited by Barbara Schneider-Kempf / Klaus Gerhard Saur /  
Peter-Klaus Schuster

2005. 574 pages. Hardbound with dust cover

€ 128.00

ISBN 3-598-11729-9

The Festschrift for the 65th birthday of the president of  
the Stiftung Preußischer Kulturbesitz (Foundation for  
Prussian Cultural Heritage) contains more than 60 contri-  
butions by individuals from culture and politics, libraries  
and publishers. Among the contributors are Heinz  
Berggruen, W. Michael Blumenthal, Karl Dedecius,  
Wolfgang Frühwald, Vittorio E. Klostermann, Norbert  
Lammert, Hermann Leskien, Jutta Limbach, Wolf D.  
Lucius, Michael Naumann, June Newton, Elisabeth  
Niggemann, Paul Raabe, Petra Roth, Henning Schulte-  
Noelle, Ruth Wagner, Christina Weiss, Karin von Welck,  
Christoph Wolff and Klaus Wowereit, et al. The subjects  
cover a spectrum ranging from the visual arts to museum  
designs and many aspects of books, publishing, librar-  
ianship and the promotion of culture.

K · G · Saur Verlag

Library and  
Information Science

January – June  
2005

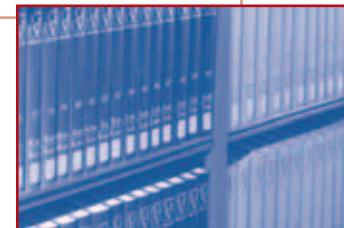

World Guide to Library, Archive, and Information Science Associations

IFLA Publications 112-114  
2nd edition 2005. 510 pages  
€ 168.00. Special price for IFLA members: € 131.00  
ISBN 3-598-21840-0

This handbook provides thorough, up-to-date information on associations concerned with the fields of librarian-ship, documentation, information science and archives. The second, completely revised and considerably enlarged edition contains 633 comprehensive and updated entries from over 130 countries. Over 170 new entries documenting the latest trends and developments in the field are included. The first part lists internationally active associations in alphabetical order. In the second part, national associations are arranged by country, and listed within the countries alphabetically. The volume includes indexes of names, subjects and official organs. A bibliography of relevant literature since 1990 offers the user helpful further information.

- The entries contain the following details:
- Name, with abbreviation and English translation where available
  - Address with telephone, telex, fax, eMail and URL
  - Functionaries, members of staff
  - Languages, Year of foundation
  - Main field of interest and goals
  - Structure, finances
  - Summary of members (numbers, structure, types of membership)
  - Membership conferences, congresses, publications
  - Activities (e.g. legislative proceedings or educational)

e-Learning for Management and Marketing in Libraries /

e-Formation pour le marketing et le management des bibliothèques

Section Management & Marketing / Marketing & Management Section  
Papers presented at the IFLA Satellite Meeting Geneva, Switzerland, July 28-30,2003

IFLA Publications 115  
Edited by Daisy McAdam  
2005. 165 pages. Hardbound  
€ 74.00. Special price for IFLA members € 55.00  
ISBN 3-598-21843-5

The contributions to the conference held in Geneva in 2003, focus on the very latest approaches to ‘e-Learning’. The power and enormous diversity of this medium, becomes apparent as experts from all over the world compare notes and raise a whole new range of issues. The reader can examine the presentations of the various practitioners, or go straight to the discussions at the end, for insights into what the future holds for teachers and students alike.

Volumes 116 and 117 of the series IFLA Publications will also be published in 2005.  
Additional volumes are available. Please request further information.

IFLA Guidelines for Online Public Access Catalogue (OPAC) Displays

Final Report May 2005  
IFLA Series on Bibliographic Control. Volume 27  
2005. 61 pages. Hardbound  
€ 34.00. Special price for IFLA members € 26.80  
ISBN 3-598-24276-X

Existing Online Public Access Catalogues (OPACs) demonstrate differences in the range and complexity of their functional features, terminology, and help facilities. While many libraries already have OPACs, there is a need to bring together, in the form of guidelines or recommendations, a corpus of good practice to assist libraries in designing or re-designing the displays for their OPACs, taking into consideration the needs of users. The audience for these guidelines is librarians charged with customizing OPAC software and vendors and producers of this software. The guidelines are mainly designed for general libraries with collections of resources in the humanities, the social sciences, and the pure and applied sciences. The guidelines are intended to apply to any type of catalogue, independently of the kind of interface and technology used.

IFLA Cataloguing Principles: Steps towards an International Cataloguing Code 2

Report form the 2nd Meeting of Experts on an International Cataloguing Code, Buenos Aires, Argentina, 2004  
IFLA Series on Bibliographic Control. Volume 28  
2005. Hardbound  
€ 78.00. Special price for IFLA members € 58.00  
ISBN 3-598-24277-8

Volume 26 of *IFLA Series on Bibliographic Control* was the start of a process towards an International Cataloguing Code that will continue through 2010. Through the series of meetings represented by each volume, the reader will be able to track the development and consultation taking place throughout the different parts of the world, that will culminate in the creation of a truly international cataloguing code. This volume 28, contains information in English and Spanish on the use of cataloguing rules throughout Latin America and the Carribean and provides interesting perspectives by the experts representing each of these countries in today's environment.

Order form. Please send me:

- \_\_Copy/ies: **Bibliothekswissenschaft - quo vadis / Library Science - quo vadis**  
€ 75.00. E-11734-5
- \_\_Copy/ies: **Corporate Memory**  
€ 68.00. E-24371-5
- \_\_Copy/ies: **The Impact of Information on Society**  
€ 98.00. E-11648-9
- \_\_Copy/ies: **Wissenschaft und Kultur in Bibliotheken, Museen und Archiven**  
€ 128.00. E-11729-9
- \_\_Copy/ies: **World Guide to Library, Archive, and Information Science Associations**  
€ 168.00  
Special price for IFLA members: € 131.00. E-21840-0
- \_\_Copy/ies: **e-Learning for Management and Marketing in Libraries**  
€ 74.00  
Special price for IFLA members: € 55.50. E-21843-5
- \_\_Copy/ies: **IFLA Guidelines for Online Public Access Catalogue (OPAC) Displays**  
€ 34.00  
IFLA members € 26.80. E-24276-X
- \_\_Copy/ies: **IFLA Cataloguing Principles: Steps towards an International Cataloguing Code 2**  
€ 78.00  
IFLA members € 58.00. E-24277-8

Name: \_\_\_\_\_

Address: \_\_\_\_\_

\_\_\_\_\_  
E-

Mail: \_\_\_\_\_

VAT-Nº.: \_\_\_\_\_

Date / Signature: \_\_\_\_\_

For more information on **K. G. Saur** titles or to place an order, please contact your regional sales office as follows:

|                                                                                                                                                                                                                                                                         |                                                                                                                                                                                                                                                                                                                       |                                                                                                                                                                                                                                                                                            |
|-------------------------------------------------------------------------------------------------------------------------------------------------------------------------------------------------------------------------------------------------------------------------|-----------------------------------------------------------------------------------------------------------------------------------------------------------------------------------------------------------------------------------------------------------------------------------------------------------------------|--------------------------------------------------------------------------------------------------------------------------------------------------------------------------------------------------------------------------------------------------------------------------------------------|
| <b>Asia</b><br>Thomson Learning<br><i>(a division of Thomson Asia Pte. Ltd.)</i><br>5 Shenton Way<br>#01-01 UIC Building<br>Singapore 068808<br>Tel: (65) 6410 1200<br>Fax: (65) 6410 1208<br>eMail: <a href="mailto:tlsg.info@thomson.com">tlsg.info@thomson.com</a>   | <b>German-Speaking Europe, Central &amp; Eastern Europe, France</b><br>K. G. Saur Verlag GmbH<br>A part of The Thomson Corporation<br>Ortlerstrasse 8, 81373 Munich<br>Germany<br>Tel: +49 (0)89 76902 300<br>Fax: +49 (0)89 76902 150/250<br>eMail: <a href="mailto:saur.info@thomson.com">saur.info@thomson.com</a> | <b>Rest of Europe, Middle East &amp; Africa</b><br>Thomson Learning<br>High Holborn House,<br>50 / 51 Bedford Row<br>London WC1R 4LR,<br>United Kingdom<br>Tel: +44 (0)20 7067 2500<br>Fax: +44 (0)20 7067 2600<br>eMail: <a href="mailto:enquiries@thomson.com">enquiries@thomson.com</a> |
| <b>Australia &amp; New Zealand</b><br>Thomson Learning (Australia)<br>102 Dodds Street, Southbank, Victoria,<br>Australia 3006<br>Tel: (+613) 9685 4280<br>Fax: (+613) 9685 4241<br>eMail: <a href="mailto:gale@thomsonlearning.com.au">gale@thomsonlearning.com.au</a> | <b>Ibero America</b><br>Thomson Learning Ibero America<br>Monte Elbruz 132, 1er Piso<br>Mexico, D.F., Mexico, C.P. 11560<br>Tel: +52 (55) 5280 5130<br>Fax: +52 (55) 5280 8945<br>eMail: <a href="mailto:gale@thomsonlearning.com.mx">gale@thomsonlearning.com.mx</a>                                                 | <b>Spain &amp; Portugal</b><br>Thomson Paraninfo<br>Calle Magallanes, 25<br>28015 Madrid, Spain<br>Tel: +34 (91) 446 3350<br>Fax: +34 (91) 445 6218<br>eMail: <a href="mailto:gale@paraninfo.es">gale@paraninfo.es</a>                                                                     |
